# Supplementary material
Source: MDPI journal article supplement (https://www.mdpi.com/2071-1050/14/22/15284)
Supplement: s1 [file s1]

## Supplementary Materials

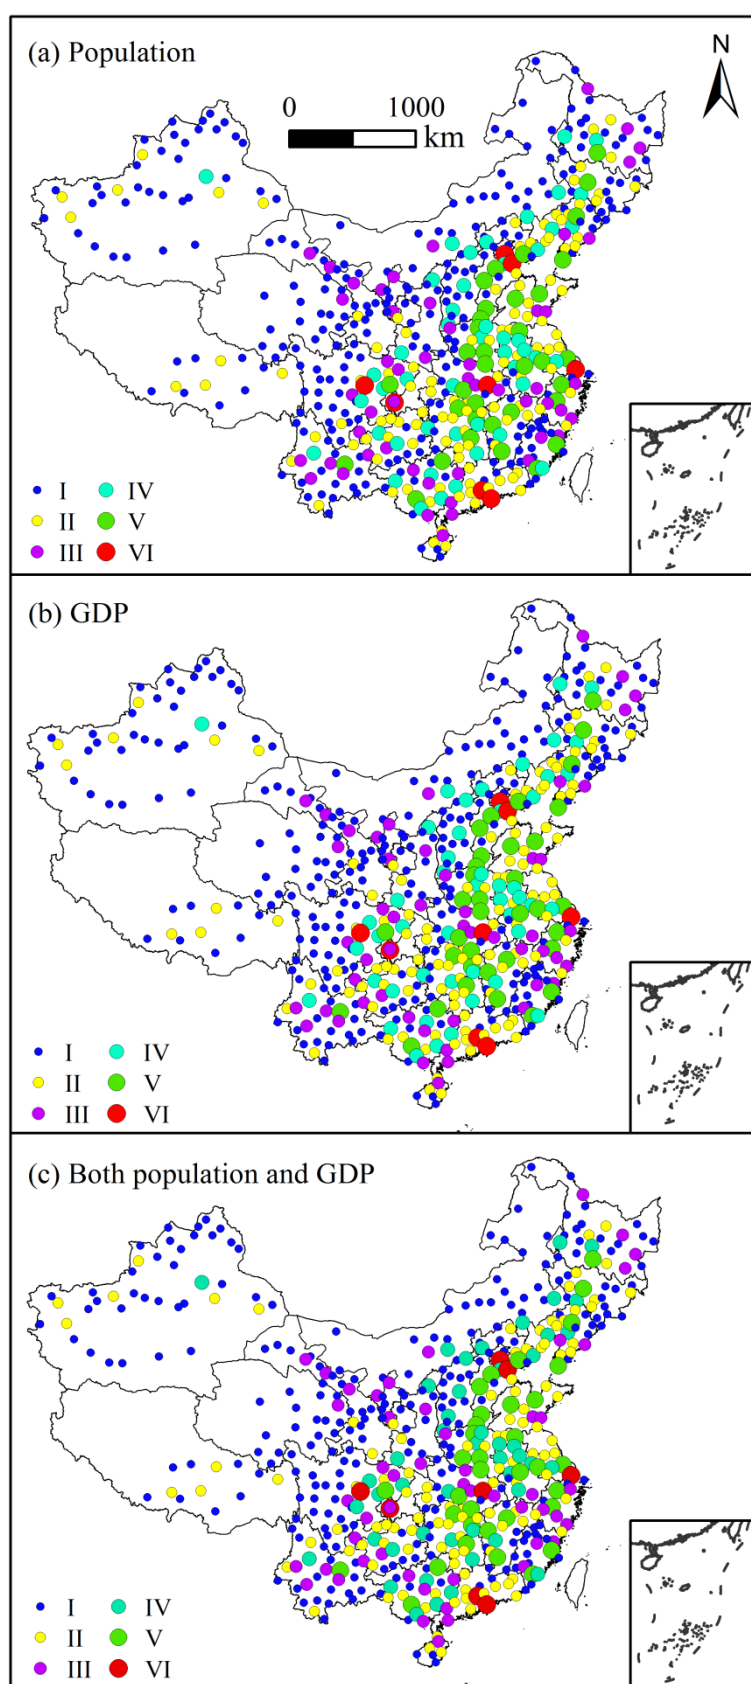

Figure S1 Levels of site-scale classified by (a) Population, (b) GDP and (c) Both population and

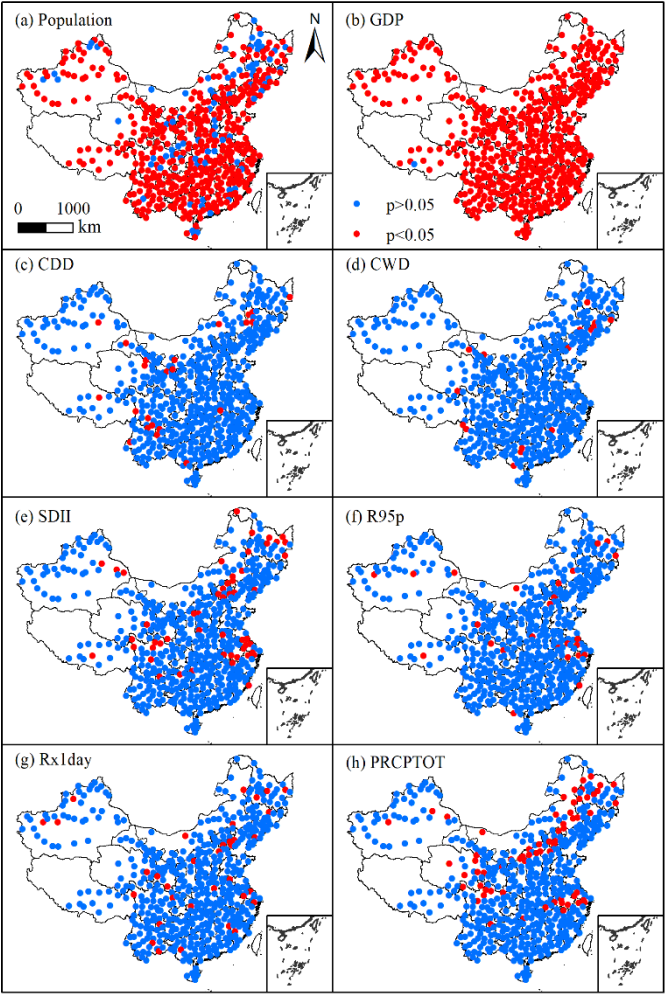

Figure S2 Statistical significance test of population, GDP, CDD, CWD, SDII, R95p, Rx1day, and PRCPTOT.
